# Supplementary material for: Bioactive Compounds in Plasma as a Function of Sex and Sweetener Resulting from a Maqui-Lemon Beverage Consumption Using Statistical and Machine Learning Techniques
Source: MDPI journal article supplement (doi:10.3390/ijms24032140), 2023-01-21
Supplement: s1 [file s1]

Table S1. Pairwise T-test results from anthocyanins

|     |                     | Sweetener  |       |       |            |
|-----|---------------------|------------|-------|-------|------------|
|     |                     | SA         | ST    | SU    | 1-way sex  |
| Sex | <b>caffeic acid</b> |            |       |       |            |
|     | M                   | 0.000234   |       | 0.006 | 0.00000299 |
|     | F                   | 0.002      | 0.003 |       | 0.00000932 |
|     | 1-way sweetener     | 0.00000158 | 0.002 | 0.002 | 1.38e-10   |

  

|     |                 | Sweetener |    |       |           |
|-----|-----------------|-----------|----|-------|-----------|
|     |                 | SA        | ST | SU    | 1-way sex |
| Sex | <b>CA-Gluc</b>  |           |    |       |           |
|     | M               |           |    | 0.046 | 0.01      |
|     | F               |           |    |       |           |
|     | 1-way sweetener |           |    |       | 0.016     |

  

|     |                 | Sweetener |       |       |              |
|-----|-----------------|-----------|-------|-------|--------------|
|     |                 | SA        | ST    | SU    | 1-way sex    |
| Sex | <b>TOTAL CA</b> |           |       |       |              |
|     | M               | 0.000473  |       | 0.002 | 0.00000825   |
|     | F               |           | 0.018 |       | 0.000339     |
|     | 1-way sweetener |           |       |       | 0.0000000189 |

  

|     |                 | Sweetener |       |          |               |
|-----|-----------------|-----------|-------|----------|---------------|
|     |                 | SA        | ST    | SU       | 1-way sex     |
| Sex | <b>DHPAA</b>    |           |       |          |               |
|     | M               | 0.003     | 0.001 | 0.00035  | 0.00000000911 |
|     | F               |           |       |          | 0.038         |
|     | 1-way sweetener | 0.005     | 0.001 | 0.000368 | 0.0000000217  |

  

|     |                   | Sweetener |    |       |           |
|-----|-------------------|-----------|----|-------|-----------|
|     |                   | SA        | ST | SU    | 1-way sex |
| Sex | <b>DHPAA-Gluc</b> |           |    |       |           |
|     | M                 | 1.25e-4   |    | 3 e-3 | 0.0000185 |
|     | F                 |           |    |       | 0.048     |
|     | 1-way sweetener   | 0.000133  |    | 0.003 |           |

  

|     |                      | Sweetener |       |    |           |
|-----|----------------------|-----------|-------|----|-----------|
|     |                      | SA        | ST    | SU | 1-way sex |
| Sex | <b>DHPAA-di-Gluc</b> |           |       |    |           |
|     | M                    | 0.00041   |       |    | 0.000291  |
|     | F                    | 0.02      | 0.029 |    | 0.016     |
|     | 1-way sweetener      | 0.0000201 | 0.016 |    | 0.0000124 |

|     |                    | Sweetener |    |       |           |
|-----|--------------------|-----------|----|-------|-----------|
|     |                    | SA        | ST | SU    | 1-way sex |
| Sex | DHPAA.Gluc.Sulfate | 0.002     |    | 0.011 | 3.36e-5   |
|     | F                  |           |    |       |           |
|     | 1-way sweetener    | 6.64e-4   |    |       | 0.000375  |

|     |                  | Sweetener |    |    |           |
|-----|------------------|-----------|----|----|-----------|
|     |                  | SA        | ST | SU | 1-way sex |
| Sex | DHPAA-di-Sulfate | 0.007     |    |    | 0.021     |
|     | F                |           |    |    |           |
|     | 1-way sweetener  |           |    |    |           |

|     |                 | Sweetener  |           |          |           |
|-----|-----------------|------------|-----------|----------|-----------|
|     |                 | SA         | ST        | SU       | 1-way sex |
| Sex | TOTAL DHPAA     | 3.31e-5    | 5.17e-4   | 1.04e-4  | 4.88e-11  |
|     | F               | 2.3 e-2    | 3.6 e-2   |          | 6.57e- 4  |
|     | 1-way sweetener | 0.00000288 | 0.0000568 | 0.000123 | 5.26e-13  |

|     |                 | Sweetener |       |    |           |
|-----|-----------------|-----------|-------|----|-----------|
|     |                 | SA        | ST    | SU | 1-way sex |
| Sex | TFA-Gluc        |           |       |    |           |
|     | F               |           |       |    |           |
|     | 1-way sweetener |           | 0.017 |    |           |

|     |                 | Sweetener |       |    |           |
|-----|-----------------|-----------|-------|----|-----------|
|     |                 | SA        | ST    | SU | 1-way sex |
| Sex | TFA-Sulfate     |           |       |    |           |
|     | F               | 0.004     | 0.003 |    |           |
|     | 1-way sweetener |           | 0.02  |    |           |

|     |                 | Sweetener |          |    |           |
|-----|-----------------|-----------|----------|----|-----------|
|     |                 | SA        | ST       | SU | 1-way sex |
| Sex | TOTAL TFA       |           |          |    |           |
|     | F               |           | 0.000704 |    | 0.02      |
|     | 1-way sweetener |           | 0.004    |    | 0.031     |

|     |                 | Sweetener |    |          |             |
|-----|-----------------|-----------|----|----------|-------------|
| Sex | VA-GG           | SA        | ST | SU       | 1-way sex   |
|     | M               | 6.32e-7   |    | 5 e-3    | 0.000000147 |
|     | F               | 2.34e-4   |    | 1.8 e-2  | 0.0000363   |
|     | 1-way sweetener | 5.93e-10  |    | 2.37e- 4 | 2.9e-11     |

|     |                 | Sweetener |       |    |           |
|-----|-----------------|-----------|-------|----|-----------|
| Sex | VA-Sulfate      | SA        | ST    | SU | 1-way sex |
|     | M               |           |       |    | 0.028     |
|     | F               | 0.025     | 0.027 |    |           |
|     | 1-way sweetener | 0.012     | 0.004 |    |           |

|     |                 | Sweetener |    |    |           |
|-----|-----------------|-----------|----|----|-----------|
|     | VA-Gluc-Sulfate | SA        | ST | SU | 1-way sex |
| Sex | M               | 0.024     |    |    | 0.002     |
|     | F               | 0.021     |    |    |           |
|     | 1-way sweetener | 0.001     |    |    | 0.000444  |

|     |                 | Sweetener |    |    |           |
|-----|-----------------|-----------|----|----|-----------|
|     | VA-di-Sulfate   | SA        | ST | SU | 1-way sex |
| Sex | M               |           |    |    | 0.017     |
|     | F               |           |    |    |           |
|     | 1-way sweetener | 0.033     |    |    |           |

Figure s1. Full of compounds boxplot from anthocyanins

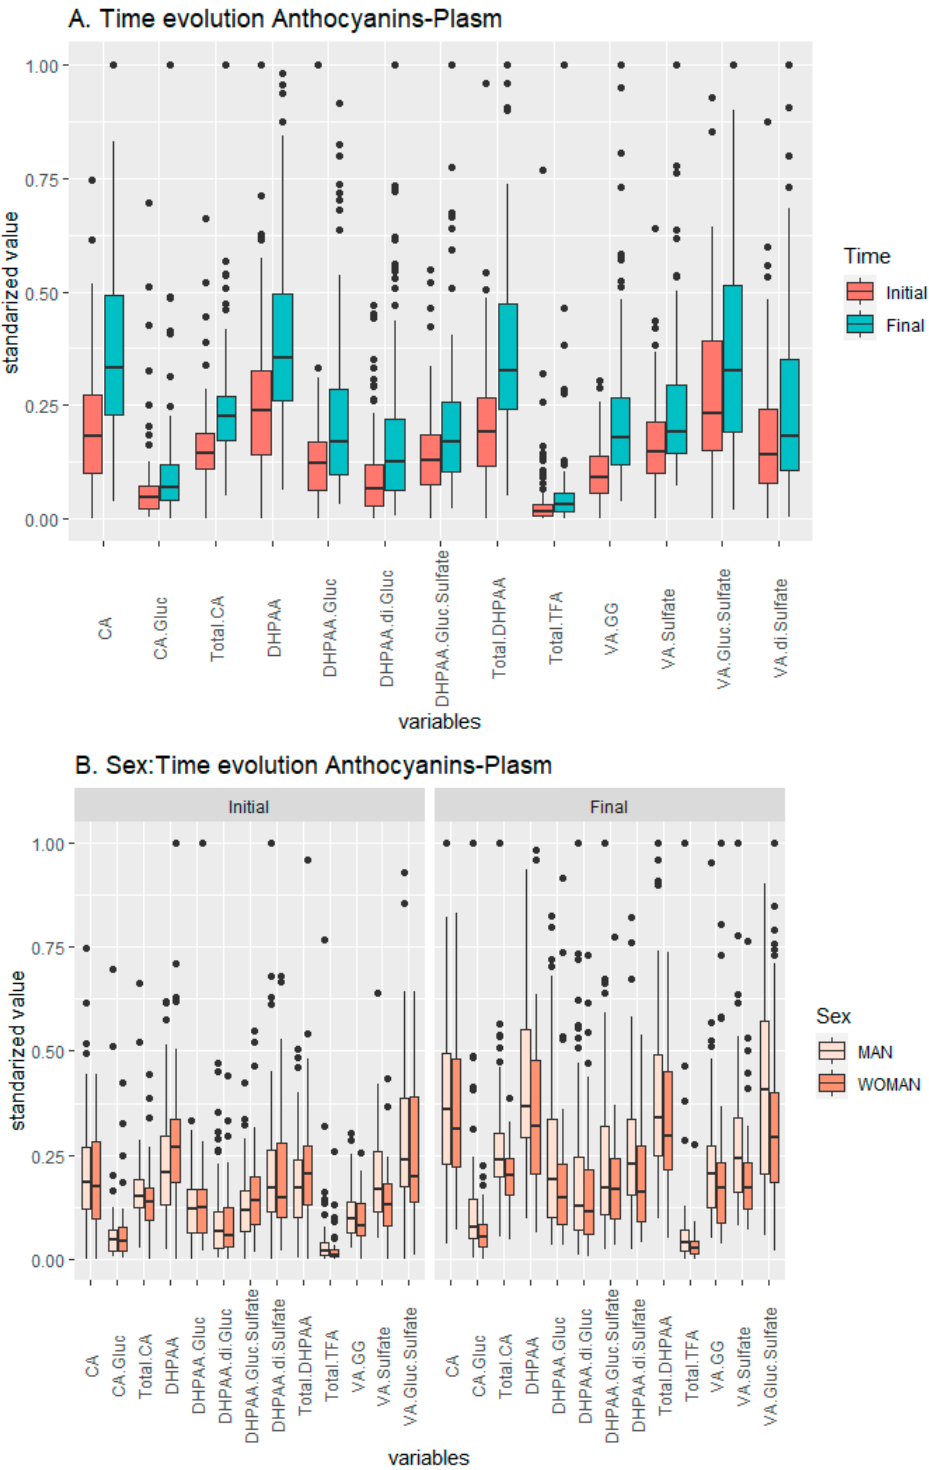

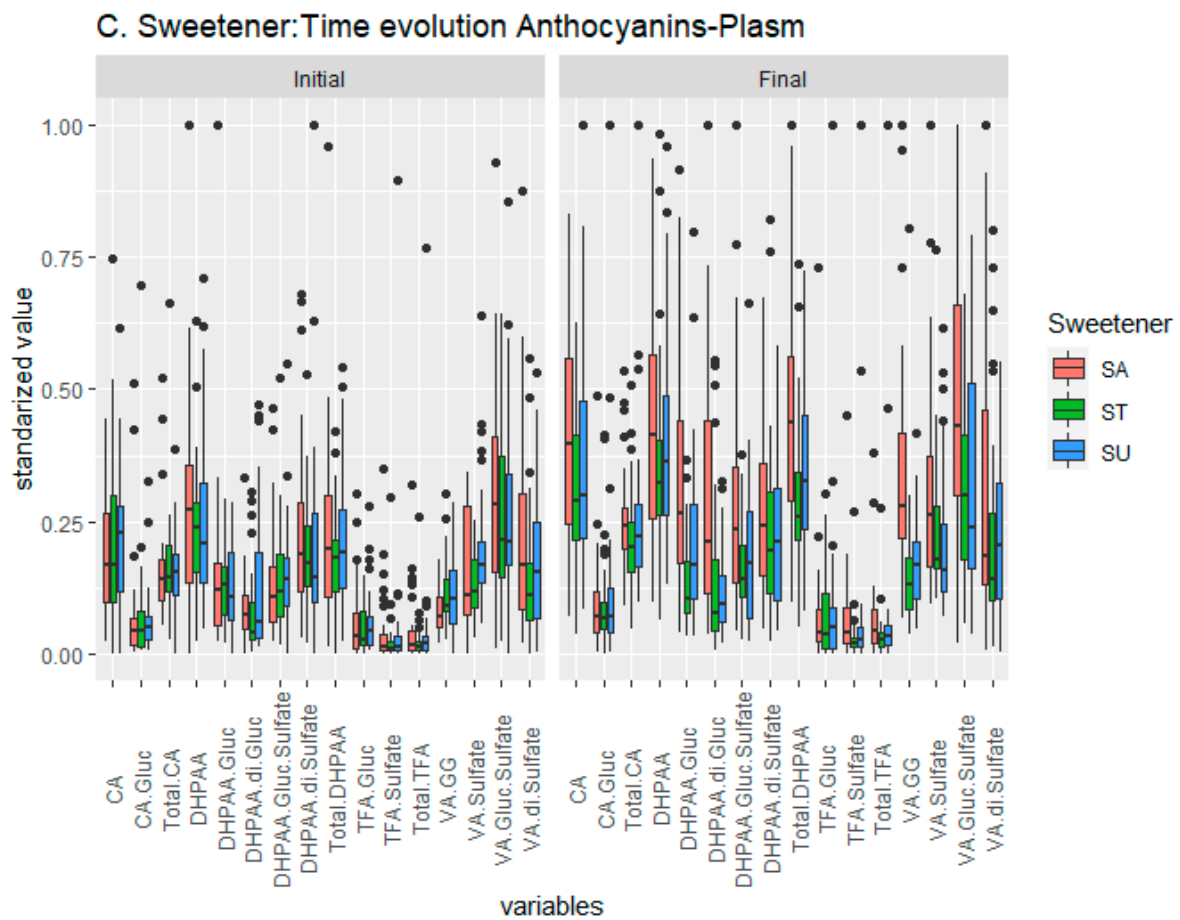

Table S2. Pairwise T-test results from flavanones

|     |                 | Sweetener |    |       |           |
|-----|-----------------|-----------|----|-------|-----------|
| Sex | Eriodyctiol     | SA        | ST | SU    | 1-way sex |
|     | M               |           |    |       | 0.017     |
|     | F               |           |    |       |           |
|     | 1-way sweetener |           |    | 0.026 | 0.006     |

  

|     |                 | Sweetener |    |    |           |
|-----|-----------------|-----------|----|----|-----------|
| Sex | ES              | SA        | ST | SU | 1-way sex |
|     | M               |           |    |    |           |
|     | F               |           |    |    |           |
|     | 1-way sweetener |           |    |    |           |

  

|     |                 | Sweetener |    |    |           |
|-----|-----------------|-----------|----|----|-----------|
| Sex | HE-G            | SA        | ST | SU | 1-way sex |
|     | M               |           |    |    |           |
|     | F               |           |    |    |           |
|     | 1-way sweetener |           |    |    |           |

|     |                 |       |       |       |
|-----|-----------------|-------|-------|-------|
| Sex | M               | 0.039 | 0.018 | 0.003 |
|     | F               | 0.033 |       |       |
|     | 1-way sweetener | 0.004 | 0.003 |       |

  

| Sweetener |                 |       |           |          |           |
|-----------|-----------------|-------|-----------|----------|-----------|
| Sex       | NG              | SA    | ST        | SU       | 1-way sex |
|           | M               |       | 0.0000592 | 0.013    | 0.006     |
|           | F               | 0.021 |           | 0.016    | 0.000621  |
|           | 1-way sweetener |       | 0.000641  | 0.000418 | 0.000109  |

Table S3. Descriptive statistics

Anthocyanins

|                    |   | Mini   |        | Trimmed | Median |        | Varianc | Desviat |        | Maxi | Symme  | Kurtosi |
|--------------------|---|--------|--------|---------|--------|--------|---------|---------|--------|------|--------|---------|
|                    |   | mum    | Q1     | Mean    | Mean   | n      | e       | ion     | Q3     | mum  | try    | s       |
| CA                 | 0 | 0.1445 | 0.2807 | 0.2737  | 0.2409 | 0.2289 | 0.0326  | 0.1805  | 0.3855 |      | 0.9725 | 0.8674  |
|                    |   | 7831   | 0238   | 8894    | 6386   | 1566   | 007     | 5663    | 4217   | 1    | 9014   | 4927    |
|                    |   |        | 0.0826 | 0.0714  | 0.0553 | 0.0714 | 0.0116  | 0.1079  | 0.0937 |      | 4.3627 | 26.312  |
| CA.Gluc            | 0 | 0.025  | 3513   | 7674    | 5714   | 2857   | 5026    | 3636    | 5      | 1    | 6121   | 1707    |
|                    |   | 0.1537 | 0.2810 | 0.2712  | 0.2258 | 0.1774 | 0.0342  | 0.1849  | 0.3709 |      | 1.3958 | 1.8971  |
| CA.Sulfate         | 0 | 0184   | 4441   | 7795    | 0645   | 1935   | 0493    | 4575    | 6774   | 1    | 7125   | 6173    |
|                    |   | 0.1327 | 0.1992 | 0.1923  | 0.1775 | 0.1436 | 0.0123  | 0.1111  | 0.2411 |      | 2.4655 | 11.745  |
| Total.CA           | 0 | 9133   | 7441   | 5451    | 0678   | 3144   | 5968    | 7408    | 9241   | 1    | 7979   | 235     |
|                    |   | 0.1896 | 0.3223 | 0.3141  | 0.2896 |        | 0.0362  | 0.1904  | 0.4083 |      | 1.1204 | 1.4230  |
| DHPAA              | 0 | 0938   | 1099   | 5254    | 875    | 0.0475 | 5776    | 1471    | 5938   | 1    | 4748   | 1019    |
|                    |   | 0.0774 | 0.1773 | 0.1647  | 0.1376 | 0.1189 | 0.0244  | 0.1565  | 0.2169 |      | 2.4442 | 7.4357  |
| DHPAA.Gluc         | 0 | 6849   | 2986   | 24      | 0504   | 2583   | 9436    | 0675    | 1176   | 1    | 986    | 9184    |
|                    |   | 0.0447 | 0.1372 | 0.1253  | 0.0820 | 0.0722 | 0.0227  | 0.1507  | 0.1572 |      | 2.3980 | 6.8828  |
| DHPAA.di.Gluc      | 0 | 1154   | 6093   | 5993    | 5128   | 6583   | 138     | 11      | 1154   | 1    | 8473   | 7578    |
|                    |   | 0.0937 | 0.1742 | 0.1642  | 0.1428 | 0.1388 | 0.0175  | 0.1326  | 0.2117 |      | 2.3693 | 8.5364  |
| DHPAA.Gluc.Sulfate | 0 | 5      | 8358   | 8304    | 5714   | 866    | 9301    | 3865    | 3469   | 1    | 6706   | 687     |
|                    |   | 0.1180 | 0.2251 | 0.2160  | 0.1934 |        | 0.0261  | 0.1617  | 0.2883 |      | 1.6254 | 3.5195  |
| DHPAA.di.Sulfate   | 0 | 9045   | 9777   | 2806    | 6734   | NA     | 647     | 5506    | 1658   | 1    | 623    | 4486    |
|                    |   | 0.1571 | 0.2854 | 0.2765  | 0.2451 | 0.1285 | 0.0348  | 0.1866  | 0.3659 |      | 1.2640 | 1.9572  |
| Total.DHPAA        | 0 | 1948   | 7576   | 789     | 4847   | 9481   | 2791    | 2236    | 1069   | 1    | 5188   | 0035    |
|                    |   | 0.0148 | 0.0694 | 0.0594  | 0.0395 |        | 0.0112  | 0.1059  | 0.0884 |      | 5.1945 | 37.288  |
| TFA.Gluc           | 0 | 2702   | 4989   | 7039    | 3871   | NA     | 219     | 3347    | 1296   | 1    | 5133   | 9477    |
|                    |   | 0.0095 | 0.0447 | 0.0321  | 0.0200 | 0.0200 | 0.0103  | 0.1019  | 0.0399 |      | 6.5892 | 51.303  |
| TFA.Sulfate        | 0 | 2212   | 9858   | 4121    | 8458   | 8458   | 9249    | 4358    | 3672   | 1    | 7616   | 8933    |
|                    |   | 0.0102 | 0.0455 | 0.0342  | 0.0228 |        | 0.0089  | 0.0947  | 0.0449 |      | 6.6983 | 54.930  |
| Total.TFA          | 0 | 4132   | 3054   | 0836    | 666    | 0      | 8606    | 9484    | 9124   | 1    | 5957   | 2245    |
|                    |   | 0.1215 | 0.2458 | 0.2369  | 0.1950 |        | 0.0331  | 0.1820  | 0.3403 |      | 1.3993 | 2.9588  |
| VA                 | 0 | 0127   | 8932   | 4194    | 8058   | NA     | 5775    | 9271    | 3079   | 1    | 4808   | 0962    |
|                    |   | 0.0776 | 0.1626 | 0.1507  | 0.1249 | 0.0967 | 0.0194  | 0.1393  | 0.2080 |      | 2.8186 | 11.124  |
| VA.GG              | 0 | 0652   | 6258   | 7732    | 2637   | 0135   | 2104    | 5939    | 429    | 1    | 9847   | 469     |
|                    |   | 0.1169 | 0.2133 | 0.2041  | 0.1739 |        | 0.0213  | 0.1460  | 0.2602 |      | 2.0658 | 5.9463  |
| VA.Sulfate         | 0 | 1023   | 7714   | 8332    | 7356   | NA     | 4362    | 9455    | 6444   | 1    | 0918   | 7362    |
|                    |   | 0.1696 | 0.3232 | 0.3162  | 0.2762 | 0.1439 | 0.0409  | 0.2022  | 0.4459 |      | 0.8716 | 0.2523  |
| VA.Gluc.Sulfate    | 0 | 325    | 0899   | 3582    | 089    | 0716   | 1964    | 8603    | 381    | 1    | 8194   | 3397    |
|                    |   | 0.0921 | 0.2109 | 0.1994  | 0.1512 | 0.0973 | 0.0331  | 0.1819  | 0.2857 |      | 1.6599 | 3.0526  |
| VA.di.Sulfate      | 0 | 5362   | 309    | 6066    | 3117   | 5916   | 1887    | 859     | 4054   | 1    | 9669   | 7265    |

|          |   |               |                |                |                |                |                |                |                |   |               |                |
|----------|---|---------------|----------------|----------------|----------------|----------------|----------------|----------------|----------------|---|---------------|----------------|
| Total.VA | 0 | 0.1076<br>294 | 0.2026<br>0815 | 0.1922<br>7331 | 0.1705<br>7139 | 0.0960<br>1284 | 0.0223<br>0184 | 0.1493<br>3801 | 0.2455<br>7465 | 1 | 2.2016<br>654 | 7.0206<br>8395 |
|----------|---|---------------|----------------|----------------|----------------|----------------|----------------|----------------|----------------|---|---------------|----------------|

## Flavanones:

|         | Minimum | Q1             | Mean           | Trimmed Mean   | Median         | Mode           | Variance       | Desviation     | Q3             | Maximum | Symmetry       | Kurtosis       |
|---------|---------|----------------|----------------|----------------|----------------|----------------|----------------|----------------|----------------|---------|----------------|----------------|
| E       | 0       | 0.22222<br>222 | 0.32407<br>075 | 0.31653<br>763 | 0.33333<br>333 | 0.22222<br>222 | 0.03352<br>035 | 0.18308<br>564 | 0.44444<br>444 | 1       | 0.94455<br>012 | 0.94310<br>987 |
| ES      | 0       | 0.076          | 0.12492<br>907 | 0.11729<br>835 | 0.1            | 0.1            | 0.01219<br>346 | 0.11042<br>401 | 0.2            | 1       | 2.78849<br>893 | 16.1958<br>255 |
| Total.E | 0       | 0.125          | 0.35119<br>048 | 0.34375        | 0.25           | NA             | 0.07716<br>318 | 0.27778<br>262 | 0.59375        | 1       | 0.65083<br>916 | 0.62919<br>089 |
| HE.G    | 0       | 0.00019<br>9   | 0.00761<br>996 | 0.00260<br>899 | 0.00059<br>701 | 0.00019<br>9   | 0.00409<br>201 | 0.06396<br>884 | 0.00199<br>005 | 1       | 15.0642<br>182 | 230.561<br>31  |
| NG      | 0       | 0.02634<br>979 | 0.05697<br>68  | 0.04988<br>577 | 0.04348<br>3   | 0.01360<br>692 | 0.00546<br>371 | 0.07391<br>692 | 0.06529<br>456 | 1       | 8.88956<br>198 | 105.385<br>564 |
